# Supplementary material for: Genome-wide survey and expression analysis of the OMT gene family in Stephania japonica
Source: PeerJ journal article supplement (doi:10.7717/peerj.18600), 2025-02-10
Supplement: Table_S1.xlsx [file Table_S1.xlsx]

## Sheet: Sheet1
Gene name	Orientain	Sequence 5' - 3'
SjCOMT11	FORWARD	GTTGGATGCGGAGTCGAGTTACG
SjCOMT11	REVERSE	ACAACTTCTGCCATTCTGCCTCAC
SjCOMT13	FORWARD	GCCCGAGCCCAAGTCTTCAATG
SjCOMT13	REVERSE	TCTCTCTTTCCCACCAGGCAGTAG
SjCOMT15	FORWARD	GGGCAGATGGTGTATGGCTTGAC
SjCOMT15	REVERSE	GCTCTCAATGGCGACCTTATCCTG
SjCOMT21	FORWARD	TCCAACCCGTTGCGAAATTCCTAC
SjCOMT21	REVERSE	GTGCCACGACGAAATGAAATCCTTC
SjCOMT33	FORWARD	TCTCGCCAGCCATTCAGTCCTC
SjCOMT33	REVERSE	TGGTGTCAAGCCGTACAACCTTTC
SjCOMT37	FORWARD	CAACTCATCGCTTCCCTTCACCTAC
SjCOMT37	REVERSE	ATTGGCGGCGGAGCTATTAGTATTG
SjCOMT45	FORWARD	TGAGCGTGAAGATACTGAGCAACTG
SjCOMT45	REVERSE	CTATGTCCAACACCATCTCCACCAC
