# Supplementary material for: Genome-wide survey and expression analysis of the OMT gene family in Stephania japonica
Source: PeerJ journal article supplement (doi:10.7717/peerj.18600), 2025-02-10
Supplement: Table_S2.xlsx [file Table_S2.xlsx]

## Sheet: Sheet1
Gene ID	Gnen name	Chr	Start	Stop	CDS	Protein	Mw	pl	Loc
SjapChr2G00058470.1	SjCCoAOMT1	Chr2	54909180	54912993	852	283	31330.5	8.96	chlo
SjapChr6G00165120.1	SjCCoAOMT2	Chr6	50022599	50024435	684	227	25522.7	6	cyto
SjapChr6G00165130.1	SjCCoAOMT3	Chr6	50026121	50036023	699	232	26282.1	5.01	cyto
SjapChr6G00165140.1	SjCCoAOMT4	Chr6	50036399	50038494	705	234	26475.4	4.85	cyto
SjapChr6G00165150.1	SjCCoAOMT5	Chr6	50063849	50065657	717	238	26646.6	5.58	cyto
SjapChr9G00225140.1	SjCCoAOMT6	Chr9	38399492	38401720	744	247	27807.9	5.17	cyto
SjapChr1G00001270.1	SjCOMT1	Chr1	2008709	2012996	1062	353	38918.3	5.46	cyto
SjapChr1G00001310.1	SjCOMT2	Chr1	2030056	2031725	1125	374	41345.6	5.82	cyto
SjapChr1G00003670.1	SjCOMT3	Chr1	5096016	5098714	1107	368	41659.7	5.26	cyto
SjapChr1G00003680.1	SjCOMT4	Chr1	5106754	5107824	912	303	34048.3	5.88	chlo
SjapChr1G00003720.1	SjCOMT5	Chr1	5135846	5137165	1002	333	37571	5.78	cyto
SjapChr1G00004130.1	SjCOMT6	Chr1	5554838	5556212	1098	365	40466.6	5.36	cyto
SjapChr1G00004170.1	SjCOMT7	Chr1	5600846	5602081	990	329	36655.1	5.59	cyto
SjapChr1G00004180.1	SjCOMT8	Chr1	5615023	5616262	1104	367	41116.6	5.79	cyto
SjapChr1G00027040.1	SjCOMT9	Chr1	60168583	60169749	1089	362	40250.6	5.55	cyto
SjapChr1G00031170.1	SjCOMT10	Chr1	71885774	71891222	1101	366	40644.8	5.59	chlo
SjapChr1G00032300.1	SjCOMT11	Chr1	74190613	74192765	1032	343	37861.6	5.26	cyto
SjapChr2G00050930.1	SjCOMT12	Chr2	31019250	31028832	1077	358	39455.5	5.12	cyto
SjapChr2G00057570.1	SjCOMT13	Chr2	53289030	53291871	1098	365	40565.8	6.12	cysk
SjapChr2G00057690.1	SjCOMT14	Chr2	53549909	53553233	1101	366	40740.2	5.97	cyto
SjapChr2G00057790.1	SjCOMT15	Chr2	53829111	53830681	1089	362	39997	5.29	cyto
SjapChr2G00057810.1	SjCOMT16	Chr2	53850052	53859411	1104	367	40556.9	6.21	cyto
SjapChr2G00057820.1	SjCOMT17	Chr2	53855368	53868086	1089	362	40381.9	5.36	chlo
SjapChr2G00057830.1	SjCOMT18	Chr2	53868859	53873919	1119	372	40573.9	5.44	cyto
SjapChr2G00057850.1	SjCOMT19	Chr2	53898828	53901277	816	271	30125.8	5.29	cyto
SjapChr2G00059530.1	SjCOMT20	Chr2	56539618	56542508	1080	359	40215.5	5.79	cyto
SjapChr2G00059560.1	SjCOMT21	Chr2	56617585	56618988	981	326	36606.2	5.85	cyto
SjapChr2G00064030.1	SjCOMT22	Chr2	64509516	64512050	1092	363	40651.8	5.28	cyto
SjapChr3G00071780.1	SjCOMT23	Chr3	1528600	1531066	1098	365	41177.5	6.21	cysk
SjapChr3G00087280.1	SjCOMT24	Chr3	43377502	43380744	1077	358	39832.9	6	cyto
SjapChr3G00087290.1	SjCOMT25	Chr3	43401806	43403308	771	256	28019.6	6.05	cyto
SjapChr3G00087300.1	SjCOMT26	Chr3	43418502	43421448	1104	367	41243.9	5.87	cyto
SjapChr3G00087310.1	SjCOMT27	Chr3	43422387	43425839	1062	353	38834.3	6.18	chlo
SjapChr3G00087590.1	SjCOMT28	Chr3	43831410	43833203	1095	364	40670.7	5.53	cysk
SjapChr3G00091960.1	SjCOMT29	Chr3	51797995	51799536	1053	350	39382.7	6.22	cyto
SjapChr3G00091980.1	SjCOMT30	Chr3	51806891	51808669	1053	350	39453.6	6.16	cysk
SjapChr4G00107690.1	SjCOMT31	Chr4	16008788	16011003	1182	393	43693.5	6.63	chlo
SjapChr4G00107950.1	SjCOMT32	Chr4	16603825	16606941	1119	372	41424.6	5.23	cyto
SjapChr4G00107970.1	SjCOMT33	Chr4	16618625	16620773	1107	368	40951	4.88	cyto
SjapChr4G00107980.1	SjCOMT34	Chr4	16655586	16657151	1020	339	38479.3	5.01	cyto
SjapChr4G00115220.1	SjCOMT35	Chr4	45476253	45481406	1101	366	41060.3	5.31	cyto
SjapChr4G00116260.1	SjCOMT36	Chr4	47679142	47685642	1062	353	39087	5.64	chlo
SjapChr5G00126410.1	SjCOMT37	Chr5	8153185	8157416	1089	362	40057	5.59	chlo
SjapChr5G00136850.1	SjCOMT38	Chr5	42113049	42118592	1056	351	38847.3	5.87	cyto
SjapChr6G00152010.1	SjCOMT39	Chr6	17540928	17544435	1125	374	40464.1	6.07	E.R.
SjapChr7G00174600.1	SjCOMT40	Chr7	10336704	10338625	1125	374	41411.9	5.63	cysk
SjapChr7G00174610.1	SjCOMT41	Chr7	10365101	10366664	1119	372	41408.5	5.28	cyto
SjapChr7G00174630.1	SjCOMT42	Chr7	10437709	10439337	1119	372	41403.6	5	cyto
SjapChr7G00174640.1	SjCOMT43	Chr7	10455585	10457011	1116	371	41621.9	5.36	cysk
SjapChr8G00206190.1	SjCOMT44	Chr8	41941834	41943496	1047	348	38901.3	6.15	cyto
SjapChr8G00209330.1	SjCOMT45	Chr8	48033201	48035483	1065	354	39601.9	5.76	cyto
SjapChr9G00228720.1	SjCOMT46	Chr9	44862368	44865315	1032	343	38302	6.2	cyto
SjapChr10G00238460.1	SjCOMT47	Chr10	12757012	12758297	963	320	35649.1	5.12	cyto
SjapChr10G00244290.1	SjCOMT48	Chr10	38124656	38126679	1167	388	43948.7	5.38	cyto
SjapChr10G00245680.1	SjCOMT49	Chr10	41793201	41795648	1050	349	38627.9	5.83	cyto
SjapChr10G00247510.1	SjCOMT50	Chr10	44859495	44861781	1083	360	40131.6	5.38	cyto
SjapChr11G00256100.1	SjCOMT51	Chr11	7671956	7674290	1098	365	41058.5	5.46	cyto
SjapChr11G00260570.1	SjCOMT52	Chr11	20844430	20847091	1110	369	41636.4	5.63	cyto
