# Supplementary material for: Genome-wide survey and expression analysis of the OMT gene family in Stephania japonica
Source: PeerJ journal article supplement (doi:10.7717/peerj.18600), 2025-02-10
Supplement: Table_S3.xlsx [file Table_S3.xlsx]

## Sheet: qRT-PCR
	GADPH	SjCOMT11	2-△△Ct	Normalization	SD	SjCOMT13	2-△△Ct	Normalization	SD	SjCOMT15	2-△△Ct	Normalization	SD	SjCOMT21	2-△△Ct	Normalization	SD	SjCOMT24	2-△△Ct	Normalization	SD	SjCOMT33	2-△△Ct	Normalization	SD	SjCOMT37	2-△△Ct	Normalization	SD	SjCOMT45	2-△△Ct	Normalization	SD
Root	28.74	20.85	1.04121	1	0.059401	24.35	1.00302	1	0.0691489	29.98	1.12037	1	0.112508	24.49	1.01261	1	0.0628649	23.9	1.02993	1	0.04019	23.61	1.042	1	0.036997	24.33	0.974649	1	0.0281047	21.62	0.958837	1	0.0363436
	28.51	21.01	0.931911			24.26	1.06759			30.3	0.897498			24.61	0.931787			23.92	1.01575			23.71	0.972216			24.3	0.995129			21.54	1.01351
	28.6	20.87	1.02688			24.46	0.929389			30.17	0.982127			24.43	1.05561			24.01	0.95432			23.69	0.985788			24.25	1.03022			21.52	1.02766
Stem	26.16	23.18	0.0364382	0.037386	0.00105072	30.8	0.00201876	0.00276071	0.000678106	29.98	0.197143	0.176808	0.0201567	25.35	0.0981686	0.085641	0.0121606	23.85	0.187619	0.184041	0.012378	24.11	0.129649	0.130908	0.00468559	24.45	0.157813	0.149437	0.00785737	22.51	0.0910429	0.0951839	0.00396238
	26.06	23.15	0.0372039			30.27	0.00291495			30.14	0.176448			25.56	0.0848704			23.8	0.194236			24.04	0.136095			24.54	0.148269			22.44	0.0955693
	26.11	23.1	0.0385159			30.07	0.0033484			30.31	0.156834			25.76	0.073884			23.99	0.170268			24.14	0.126981			24.6	0.142229			22.39	0.0989395
Leaf	28.56	27.12	0.0126469	0.0129145	0.000268535	29.7	0.0230518	0.0201857	0.00269071	30.48	0.742595	0.711383	0.0378624	27.87	0.0911723	0.084048	0.00626992	23.82	1.02045	1.00225	0.0378465	28.75	0.0276997	0.0302264	0.00219087	28.83	0.0403754	0.0405054	0.0021102	21.63	0.892562	0.915777	0.0257377
	28.62	27.06	0.013184			29.92	0.0197915			30.52	0.722289			28.07	0.0793701			23.81	1.02755			28.56	0.0315989			28.75	0.0426776			21.55	0.943454
	28.39	27.09	0.0129127			30.08	0.0177138			30.63	0.669264			28.03	0.0816015			23.91	0.95874			28.57	0.0313806			28.9	0.0384632			21.6	0.911316
Bud	26.04	26.43	0.00383896	0.00380166	0.000276736	30.53	0.00243987	0.00220499	0.000203539	30.9	0.104433	0.0656532	0.0397257	27.71	0.0191666	0.0195734	0.000491478	23.9	0.181647	0.194954	0.0208904	26.36	0.0273184	0.0267187	0.00138212	26.16	0.0483487	0.0460878	0.00201305	20.75	0.309074	0.308461	0.00962337
	26.16	26.35	0.00405785			30.76	0.00208032			32.96	0.0250447			27.69	0.0194342			23.88	0.184183			26.48	0.025138			26.25	0.0454247			20.71	0.317763
	26.14	26.56	0.00350816			30.75	0.00209479			31.53	0.0674821			27.64	0.0201195			23.63	0.219032			26.34	0.0276997			26.28	0.0444899			20.8	0.298546
